# Supplementary material for: A tungsten-mediated closed cycle of reactivity for the reduction of CO2 to CO
Source: Royal Society of Chemistry journal article supplement (doi:10.1039/c0dt00489h), 2010-01-01
Supplement: c0dt00489h.pdf [file c0dt00489h.pdf]

## Supporting Information

### A Tungsten-Mediated Closed Cycle of Reactivity for the Reduction of CO<sub>2</sub> to CO

Upul Jayarathne, Perumalreddy Chandrasekaran, Heiko Jacobsen, Joel T. Mague, and James P. Donahue\*

#### Crystallography

Orange, block-shaped crystals of *trans*-[W<sup>II</sup>Cl<sub>2</sub>(PMePh<sub>2</sub>)<sub>4</sub>] (**1**) were obtained by diffusion of hexanes vapor into a toluene solution. Owing to their sensitivity to H<sub>2</sub>O and O<sub>2</sub>, these crystals were transferred to degassed paratone oil in the nitrogen box prior to screening under a microscope for a suitable specimen for X-ray diffraction. Block-shaped orange-red crystals of [WCl<sub>4</sub>(PMe<sub>3</sub>)<sub>2</sub>] (**4a**) were obtained by cooling a pentane solution to -30 °C for 24 h. Crystals of **6** deposited from the reaction mixture upon standing undisturbed 12-18 h at ambient temperature. All other crystals were obtained by diffusion of alkane or ether vapors into benzene, THF, CH<sub>2</sub>Cl<sub>2</sub> or 1,2-dichloroethane solutions.

Data were collected with a Bruker APEX CCD diffractometer equipped with a Kryoflex attachment supplying a nitrogen stream at 100 or 200 K. Full spheres of data were obtained by collecting either three sets of 606 frames in  $\omega$  (0.3°/scan) with  $\varphi$  held constant at 0, 120, and then 240° (for **4c** and **4e**), or a combination of three sets of 400 scans in  $\omega$  (0.5°/scan) at  $\varphi = 0, 90$  and 180° and two sets of 800 scans in  $\varphi$  (0.45°/scan) at  $\omega = -30$  and 210° (for **1**, **2**, **3c**, **3e**, **4b**, **4a**, both polymorphs of [Cp\*<sub>2</sub>Co][**4c**], [Cp\*<sub>2</sub>Co][**5c**] and **6**). Data were collected under control of either the *SMART* software package<sup>1</sup> or the *APEX2* program suite<sup>2</sup>. The raw data were reduced to  $F^2$  values using the *SAINT+* software<sup>3</sup>, and a global refinement of unit cell parameters was

---

\*Department of Chemistry, Tulane University, 6400 Freret Street, New Orleans, LA 70118-5698.

performed using 2223–9958 selected reflections from the full data set. For  $[\text{W}^{\text{II}}\text{Cl}_2(\text{PMePh}_2)_4]$ , a face-indexed absorption correction was applied, while data for the remaining compounds were corrected for absorption on the basis of multiple measurements of symmetry equivalent reflections with the use of either *SADABS*<sup>4</sup> (for **3ce**, **4abce**, both polymorphs of  $[\text{Cp}^*_2\text{Co}][\mathbf{4c}]$ ,  $[\text{Cp}^*_2\text{Co}][\mathbf{5c}]$ , **6**) or *TWINABS*<sup>5</sup> (for **2**). Structure solutions were obtained by direct methods for **2**, **3c**, **4abc** and the  $P2_1/n$  polymorph of  $[\text{Cp}^*_2\text{Co}][\mathbf{4c}]$ , while Patterson methods were employed for **1**, **3e**, **4e**, the  $C2/c$  polymorph of  $[\text{Cp}^*_2\text{Co}][\mathbf{4c}]$ ,  $[\text{Cp}^*_2\text{Co}][\mathbf{5c}]$  and **6**. Refinements were accomplished by full-matrix least-squares procedures using the SHELXTL software suite<sup>6,7</sup>. In some instances, phenyl groups on the phosphine ligands displayed positional disorder; which was generally treated with a split atom model with distance and angle constraints. Interstitial solvent molecules were refined where possible, sometimes with partial site occupancies and appropriate constraints. Where refinement of interstitial solvent was not feasible, residual electron density was removed with the SQUEEZE option in PLATON. All hydrogen atoms were added in calculated positions and included as riding contributions with isotropic displacement parameters tied to those of the carbon atoms to which they were attached.

### Other Physical Methods

UV-vis spectra (molar absorptivities reported in  $M^{-1} \text{ cm}^{-1}$ ) were obtained at ambient temperature with a Hewlett-Packard 8452A diode array spectrometer, while IR spectra were taken as pressed KBr pellets with a Thermo Nicolet Nexus 670 FTIR instrument in absorption mode. All NMR spectra were recorded at 25 °C either with a Varian Unity Inova spectrometer operating at 400 and 161.8 MHz for  $^1\text{H}$  and  $^{31}\text{P}$ , respectively, or with a Bruker AVANCE 300 spectrometer operating at 121.5 MHz for  $^{31}\text{P}$ . Spectra were referenced to the solvent residual for

$^1\text{H}$  and to external 85%  $\text{H}_3\text{PO}_4$  for  $^{31}\text{P}$ . Electrochemical measurements were made with a CHI620C electroanalyzer workstation using a Ag/AgCl reference electrode, a platinum disk working electrode, Pt wire as auxiliary electrode, and  $[\text{Bu}_4\text{N}][\text{PF}_6]$  as the supporting electrolyte. The  $\text{Cp}_2\text{Fe}^+/\text{Cp}_2\text{Fe}$  couple occurred at +0.54 mV (by CV) in 0.10 M  $[\text{Bu}_4\text{N}][\text{PF}_6]$  in  $\text{CH}_2\text{Cl}_2$ . Elemental analyses were performed by Midwest Microlab, LLC of Indianapolis, IN.

**Table S1** Selected Bond Lengths (Å) and Angles (deg.) for  $[\text{Cp}^*_2\text{Co}][\text{W}^{\text{IV}}\text{Cl}_5(\text{PMePh}_2)]$ ,  $[\text{Cp}^*_2\text{Co}][\mathbf{5c}]$

|            |          |                  |           |                  |           |
|------------|----------|------------------|-----------|------------------|-----------|
| W(1)–Cl(1) | 2.370(1) | Cl(1)–W(1)–Cl(2) | 89.21(5)  | Cl(2)–W(1)–P(1)  | 89.53(4)  |
| W(1)–Cl(2) | 2.340(1) | Cl(1)–W(1)–Cl(3) | 175.86(4) | Cl(3)–W(1)–Cl(4) | 91.91(5)  |
| W(1)–Cl(3) | 2.348(1) | Cl(1)–W(1)–Cl(4) | 88.33(5)  | Cl(3)–W(1)–Cl(5) | 92.27(4)  |
| W(1)–Cl(4) | 2.346(1) | Cl(1)–W(1)–Cl(5) | 91.86(4)  | Cl(3)–W(1)–P(1)  | 87.03(4)  |
| W(1)–Cl(5) | 2.412(1) | Cl(1)–W(1)–P(1)  | 88.84(4)  | Cl(4)–W(1)–Cl(5) | 90.27(4)  |
| W(1)–P(1)  | 2.563(1) | Cl(2)–W(1)–Cl(3) | 90.45(5)  | Cl(4)–W(1)–P(1)  | 89.17(4)  |
|            |          | Cl(2)–W(1)–Cl(4) | 177.24(5) | Cl(5)–W(1)–P(1)  | 179.09(4) |
|            |          | Cl(2)–W(1)–Cl(5) | 91.06(4)  |                  |           |

**Table S2** Selected Bond Lengths (Å) and Angles (deg.) for  $[\text{W}^{\text{IV}}(\text{O})\text{Cl}_2(\text{dppe})(\text{PMePh}_2)_2]$ , Compound **3e**

|            |           |                  |           |                 |           |
|------------|-----------|------------------|-----------|-----------------|-----------|
| W(1)–O(1)  | 1.707(2)  | O(1)–W(1)–Cl(1)  | 100.40(7) | Cl(1)–W(1)–P(3) | 89.37(3)  |
| W(1)–Cl(1) | 2.4474(7) | O(1)–W(1)–Cl(2)  | 173.59(7) | Cl(2)–W(1)–P(1) | 77.48(2)  |
| W(1)–Cl(2) | 2.4910(7) | O(1)–W(1)–P(1)   | 96.11(7)  | Cl(2)–W(1)–P(2) | 82.17(3)  |
| W(1)–P(1)  | 2.4729(7) | O(1)–W(1)–P(2)   | 96.91(7)  | Cl(2)–W(1)–P(3) | 86.36(3)  |
| W(1)–P(2)  | 2.5140(7) | O(1)–W(1)–P(3)   | 94.36(7)  | P(1)–W(1)–P(2)  | 80.08(2)  |
| W(1)–P(3)  | 2.5191(8) | Cl(1)–W(1)–Cl(2) | 85.97(3)  | P(1)–W(1)–P(3)  | 96.38(2)  |
|            |           | Cl(1)–W(1)–P(1)  | 162.05(2) | P(2)–W(1)–P(3)  | 168.47(2) |
|            |           | Cl(1)–W(1)–P(2)  | 90.94(3)  |                 |           |

**Table S3** Selected Bond Lengths (Å) and Angles (deg.) for  $[\text{W}^{\text{IV}}\text{Cl}_4(\text{dppe})]$ , Compound **4e**

|            |          |                  |           |                  |           |
|------------|----------|------------------|-----------|------------------|-----------|
| W(1)–Cl(1) | 2.268(2) | Cl(1)–W(1)–Cl(2) | 98.31(8)  | Cl(2)–W(1)–P(2)  | 92.20(8)  |
| W(1)–Cl(2) | 2.330(2) | Cl(1)–W(1)–Cl(3) | 93.64(8)  | Cl(3)–W(1)–Cl(4) | 94.74(7)  |
| W(1)–Cl(3) | 2.384(2) | Cl(1)–W(1)–Cl(4) | 163.55(7) | Cl(3)–W(1)–P(1)  | 95.10(7)  |
| W(1)–Cl(4) | 2.331(2) | Cl(1)–W(1)–P(1)  | 86.95(7)  | Cl(3)–W(1)–P(2)  | 175.45(6) |
| W(1)–P(1)  | 2.607(2) | Cl(1)–W(1)–P(2)  | 84.76(8)  | Cl(4)–W(1)–P(1)  | 78.23(6)  |
| W(1)–P(2)  | 2.539(2) | Cl(2)–W(1)–Cl(3) | 92.25(8)  | Cl(4)–W(1)–P(2)  | 85.80(6)  |
|            |          | Cl(2)–W(1)–Cl(4) | 95.48(8)  | P(1)–W(1)–P(2)   | 80.57(6)  |
|            |          | Cl(2)–W(1)–P(1)  | 170.69(8) |                  |           |

**Table S4** Selected Bond Lengths (Å) and Angles (deg.) for  $[\text{W}^{\text{IV}}\text{Cl}_4(\text{PMe}_2\text{Ph})_2]$ , Compound **4b**

|            |           |                   |          |                    |          |
|------------|-----------|-------------------|----------|--------------------|----------|
| W(1)–Cl(1) | 2.3486(5) | Cl(1)–W(1)–Cl(1A) | 180.0    | Cl(2)–W(1)–P(1A)   | 89.81(2) |
| W(1)–Cl(2) | 2.3411(5) | Cl(1)–W(1)–Cl(2)  | 90.08(2) | Cl(1A)–W(1)–Cl(2A) | 90.08(2) |
| W(1)–P(1)  | 2.5510(5) | Cl(1)–W(1)–Cl(2A) | 89.92(2) | Cl(1A)–W(1)–P(1)   | 85.76(2) |
|            |           | Cl(1)–W(1)–P(1)   | 94.24(2) | Cl(1A)–W(1)–P(1A)  | 94.24(2) |
|            |           | Cl(1)–W(1)–P(1A)  | 85.76(2) | Cl(2A)–W(1)–P(1)   | 89.81(2) |
|            |           | Cl(2)–W(1)–Cl(1A) | 89.92(2) | Cl(2A)–W(1)–P(1A)  | 90.19(2) |
|            |           | Cl(2)–W(1)–Cl(2A) | 180.0    | P(1)–W(1)–P(1A)    | 180.0    |
|            |           | Cl(2)–W(1)–P(1)   | 90.19(2) |                    |          |

**Table S5** Selected Bond Lengths (Å) and Angles (deg.) for  $[\text{W}^{\text{IV}}\text{Cl}_4(\text{PMe}_3)_2]$ , Compound **4a**

|            |           |                   |          |                    |          |
|------------|-----------|-------------------|----------|--------------------|----------|
| W(1)–Cl(1) | 2.3140(8) | Cl(1)–W(1)–Cl(1A) | 180.0    | Cl(2)–W(1)–P(1A)   | 92.49(3) |
| W(1)–Cl(2) | 2.3581(6) | Cl(1)–W(1)–Cl(2)  | 89.72(2) | Cl(1A)–W(1)–Cl(2A) | 89.72(2) |
| W(1)–P(1)  | 2.5424(7) | Cl(1)–W(1)–Cl(2A) | 90.28(2) | Cl(1A)–W(1)–P(1)   | 88.51(2) |
|            |           | Cl(1)–W(1)–P(1)   | 91.49(2) | Cl(1A)–W(1)–P(1A)  | 91.49(2) |
|            |           | Cl(1)–W(1)–P(1A)  | 88.51(2) | Cl(2A)–W(1)–P(1)   | 92.49(3) |
|            |           | Cl(2)–W(1)–Cl(1A) | 90.28(2) | Cl(2A)–W(1)–P(1A)  | 87.51(3) |
|            |           | Cl(2)–W(1)–Cl(2A) | 180.0    | P(1)–W(1)–P(1A)    | 180.0    |
|            |           | Cl(2)–W(1)–P(1)   | 87.51(3) |                    |          |

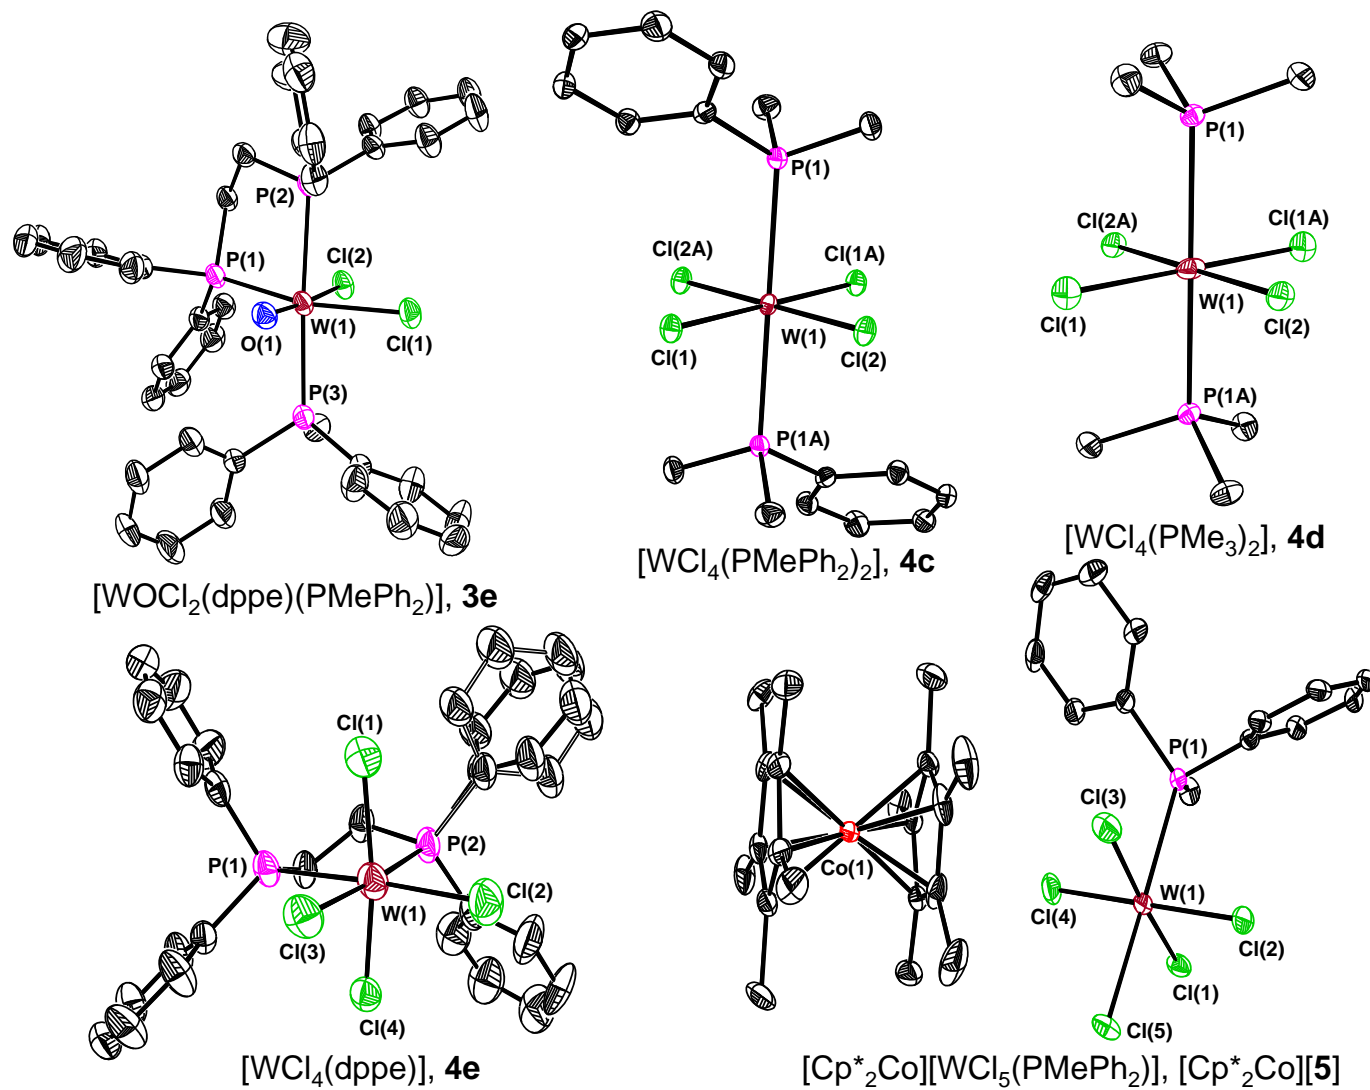

**Fig. S1** Thermal ellipsoid plots of **3e**, **4c**, **4d**, **4e** and  $[\text{Cp}^*_2\text{Co}][\mathbf{5}]$  at the 50% probability level. Hydrogen atoms are omitted for clarity.

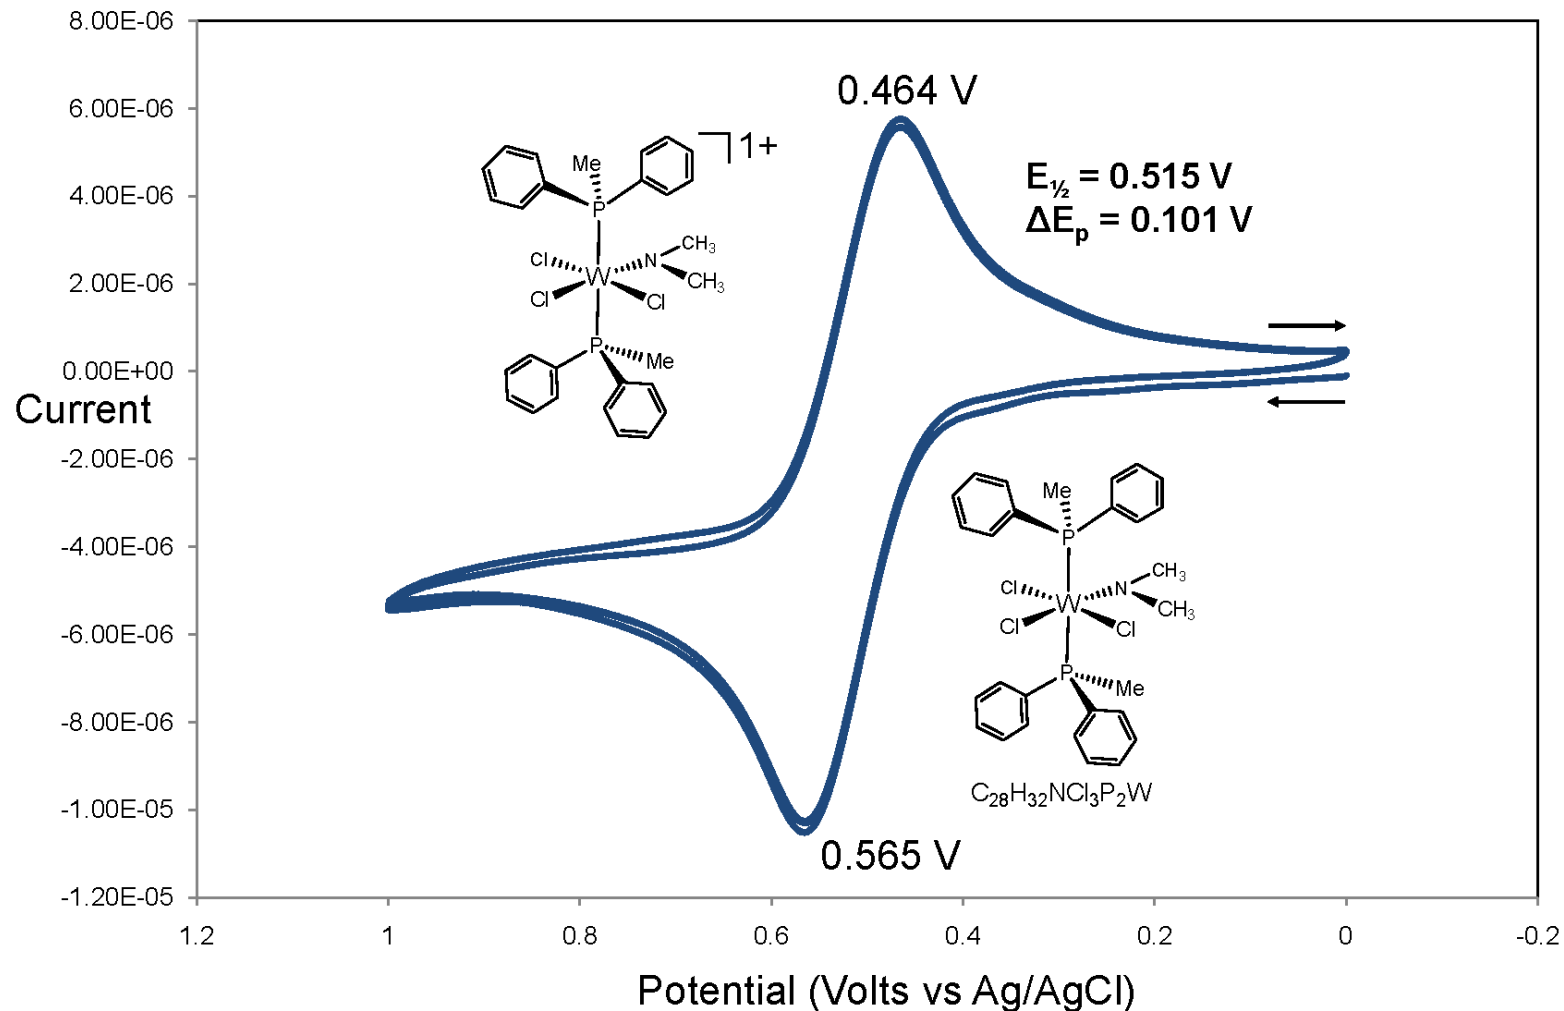

**Fig. S2** Cyclic voltammogram of  $[\text{WCl}_3(\text{NMe}_2)(\text{PMePh}_2)_2]$  in  $\text{CH}_2\text{Cl}_2$  with  $[\text{Bu}_4\text{N}][\text{PF}_6]$  supporting electrolyte and scan speed  $0.100 \text{ V/sec}$ . The wave displayed corresponds to the  $[\text{WCl}_3(\text{NMe}_2)(\text{PMePh}_2)_2] - e^- \rightarrow [\text{WCl}_3(\text{NMe}_2)(\text{PMePh}_2)_2]^{1+}$  oxidation.

|           | 20 mV/sec              | 40 mV/sec              | 60 mV/sec              | 80 mV/sec              | 100 mV/sec             | 120 mV/sec             | 140 mV/sec             | 200 mV/sec             | 300 mV/sec             | 400 mV/sec             | 500 mV/sec             |
|-----------|------------------------|------------------------|------------------------|------------------------|------------------------|------------------------|------------------------|------------------------|------------------------|------------------------|------------------------|
| $E_{p,f}$ | -0.513                 | -0.508                 | -0.519                 | -0.518                 | -0.525                 | -0.531                 | -0.531                 | -0.542                 | -0.551                 | -0.562                 | -0.562                 |
| $i_{pf}$  | $6.348 \times 10^{-6}$ | $7.858 \times 10^{-6}$ | $9.379 \times 10^{-6}$ | $9.884 \times 10^{-6}$ | $1.045 \times 10^{-5}$ | $1.379 \times 10^{-5}$ | $1.476 \times 10^{-5}$ | $1.741 \times 10^{-5}$ | $2.081 \times 10^{-5}$ | $2.327 \times 10^{-5}$ | $2.521 \times 10^{-5}$ |
| $E_{pr}$  | -0.41                  | -0.403                 | -0.401                 | -0.394                 | -0.391                 | -0.395                 | -0.393                 | -0.39                  | -0.382                 | -0.376                 | -0.374                 |
| $i_{pr}$  | $6.993 \times 10^{-6}$ | $9.203 \times 10^{-6}$ | $1.057 \times 10^{-5}$ | $1.097 \times 10^{-5}$ | $1.213 \times 10^{-5}$ | $1.354 \times 10^{-5}$ | $1.342 \times 10^{-5}$ | $1.541 \times 10^{-5}$ | $1.781 \times 10^{-5}$ | $1.901 \times 10^{-5}$ | $2.024 \times 10^{-5}$ |

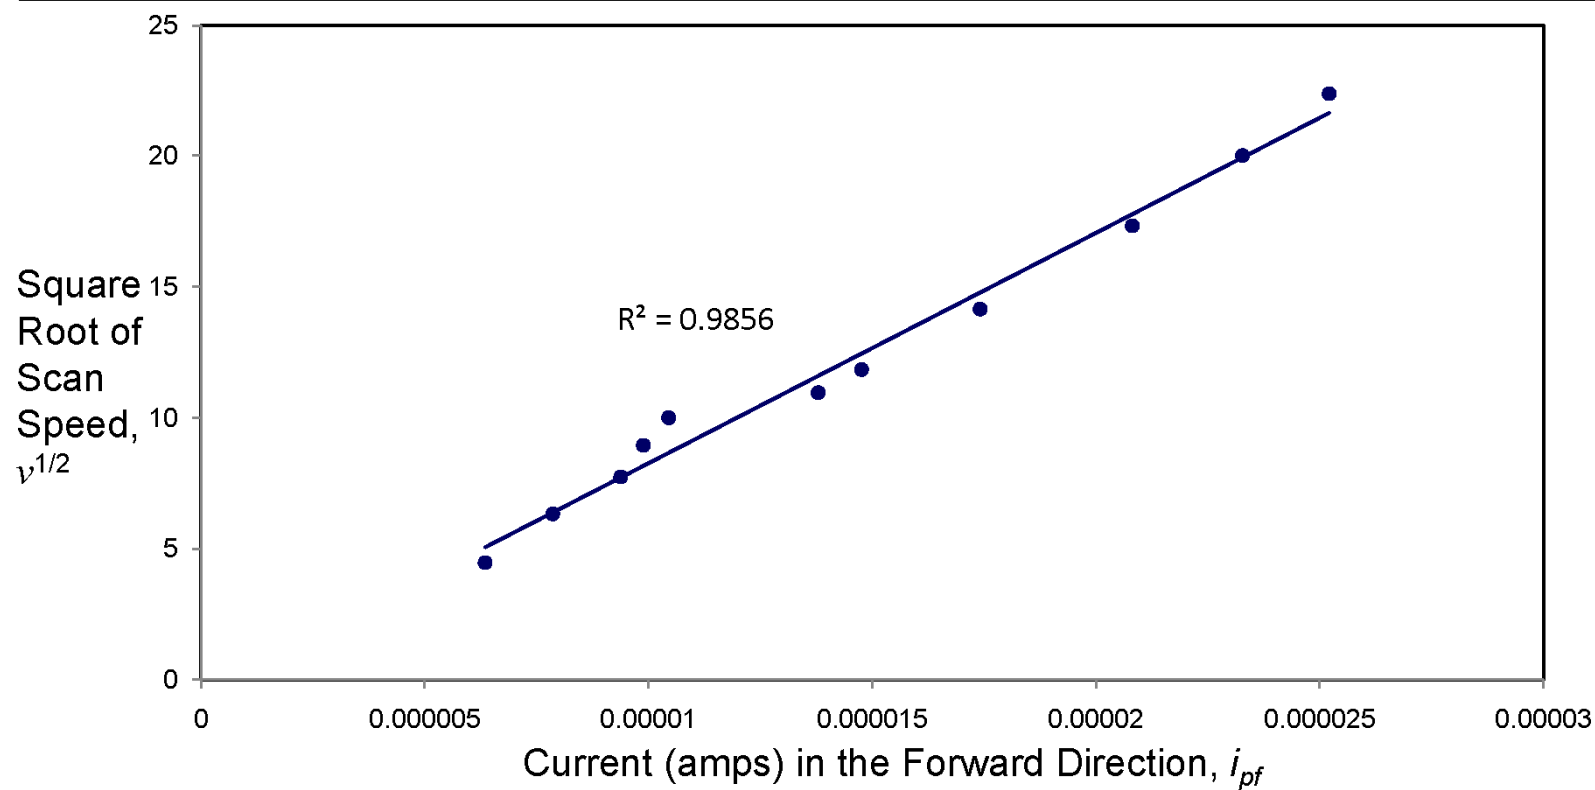

**Fig.S3** Plot of  $i_{pf}$  vs square root of scan speed for the cyclic voltammetry of  $[\text{WCl}_4(\text{PMePh}_2)_2]$ . The wave in question corresponds to the  $[\text{WCl}_4(\text{PMePh}_2)_2] + e^- \rightarrow [\text{WCl}_4(\text{PMePh}_2)_2]^{1-}$  reduction.

### Supporting Online Material - Computational Details

Geometries have been optimized and final energies have been evaluated in DFT calculations, using the PBE exchange-correlation functional as prescribed by Perdew, Burke and Ernzerhof.<sup>8</sup> For all calculations, tungsten was modeled by a small-core, quasi-relativistic effective core potential with an associated (8s7p6d)/[6s5p3d] valence basis set contracted according to a (311111/221111/411) scheme.<sup>9</sup> All main group elements except for those that are part of a phenyl group have been described by contracted Gaussian basis sets of triple zeta valence quality augmented by polarization functions (TZVP).<sup>10</sup> For phenyl groups, the C atom bonded to phosphorus has been described by a TZVP basis, whereas the remaining atoms were described by contracted Gaussian split-valence basis sets (SV).<sup>11</sup> The nature of stationary points located on the potential energy surface has been checked by harmonic frequency calculations, and all molecules considered in this work possess a harmonic spectrum without any imaginary frequencies. Enthalpies H have been evaluated at zero K from total energies E and zero-point energy correction terms (ZPE). The calculated frequency data provide thermodynamic corrections to calculate free energies G at 298 K. The *Gaussian 03* suite of programs constitutes the underlying computational engine of the present work.<sup>12</sup>



## Optimized Geometries, Convergence Criteria, Final Energies, Thermodynamic Data

### W(PH3) a

Route: #P PBEPBE/GenECP/Auto GFInput Opt(CalcFC) Nosymmetry Freq  
Atom Coordinates (x,y,z) in Angstrom

---

|    |           |           |           |
|----|-----------|-----------|-----------|
| W  | 0.029871  | 0.001673  | 0.000965  |
| Cl | 2.451111  | 0.169922  | 0.020971  |
| Cl | -2.421093 | -0.159417 | -0.020398 |
| P  | -0.162347 | 2.213696  | 1.075405  |
| H  | 1.042539  | 2.923118  | 1.383417  |
| H  | -0.855894 | 3.295733  | 0.432749  |
| H  | -0.801726 | 2.372112  | 2.352673  |
| P  | 0.149214  | -2.214541 | -1.075854 |
| H  | -0.442657 | -2.449528 | -2.364077 |
| H  | 1.439991  | -2.763868 | -1.363419 |
| H  | -0.411057 | -3.378336 | -0.446191 |
| P  | 0.048218  | -1.075027 | 2.220183  |
| H  | 1.309920  | -1.279902 | 2.865525  |
| H  | -0.638467 | -0.487836 | 3.337427  |
| H  | -0.473479 | -2.400405 | 2.411822  |
| P  | -0.061085 | 1.073641  | -2.218542 |
| H  | -0.646306 | 0.401279  | -3.345487 |
| H  | -0.751873 | 2.317845  | -2.419430 |
| H  | 1.172041  | 1.445132  | -2.844282 |

---

|                     |                                           |
|---------------------|-------------------------------------------|
| Energy E(UPBE-PBE)  | -2359.26418650 a.u.<br>-6194248.12 kJ/mol |
| SCF Convergence:    | 0.8914D-08                                |
| <S**2>:             | 2.0094                                    |
| Charge:             | 0.0000                                    |
| Maximum Force:      | 0.000003                                  |
| ZPE-correction:     | 0.107927 a.u.<br>283.36 kJ/mol            |
| Energy (298K):      | -2359.138991 a.u.<br>-6193919.42 kJ/mol   |
| Enthalpy (298K):    | -2359.138047 a.u.<br>-6193916.94 kJ/mol   |
| Free Energy (298K): | -2359.204369 a.u.<br>-6194091.07 kJ/mol   |
| Lowest Frequency    | 67.0091 cm-1                              |

### W(PH3) b

Route: #P PBEPBE/GenECP/Auto GFInput Opt Freq  
Atom Coordinates (x,y,z) in Angstrom

---

|    |           |           |           |
|----|-----------|-----------|-----------|
| W  | -0.000408 | -0.013007 | -0.293931 |
| O  | -0.001894 | -0.021057 | -2.030631 |
| Cl | 0.001457  | 0.602531  | 2.145561  |
| Cl | 0.006926  | -2.393382 | 0.265557  |
| P  | -2.497728 | -0.168970 | 0.025855  |
| H  | -3.183532 | 0.833612  | 0.769255  |
| H  | -3.291119 | -0.188084 | -1.159110 |
| H  | -2.980995 | -1.345125 | 0.670279  |
| P  | 2.498097  | -0.157242 | 0.022641  |
| H  | 2.984308  | -1.324222 | 0.681089  |
| H  | 3.288615  | -0.190832 | -1.163932 |
| H  | 3.184508  | 0.855973  | 0.751019  |
| C  | -0.005824 | 2.040339  | -0.295724 |
| O  | -0.008694 | 3.198160  | -0.311846 |

---

|                     |                                           |
|---------------------|-------------------------------------------|
| Energy E(RPBE-PBE)  | -1861.78057367 a.u.<br>-4888104.90 kJ/mol |
| SCF Convergence:    | 0.3475D-08                                |
| <S**2>:             | 0.0000                                    |
| Charge:             | 0.0000                                    |
| Maximum Force:      | 0.000003                                  |
| ZPE-correction:     | 0.066510 a.u.<br>174.62 kJ/mol            |
| Energy (298K):      | -1861.699630 a.u.<br>-4887892.38 kJ/mol   |
| Enthalpy (298K):    | -1861.698685 a.u.<br>-4887889.90 kJ/mol   |
| Free Energy (298K): | -1861.757556 a.u.<br>-4888044.46 kJ/mol   |
| Lowest Frequency    | 55.8431 cm-1                              |

### W(PH3) c

Route: #P PBEPBE/GenECP/Auto GFInput Opt Freq  
Atom Coordinates (x,y,z) in Angstrom

---

|    |           |           |           |
|----|-----------|-----------|-----------|
| W  | 0.000132  | -0.064617 | -0.299810 |
| O  | 0.000588  | -0.041040 | -2.033167 |
| Cl | -0.000799 | 0.542870  | 2.176054  |
| Cl | -0.000385 | -2.447483 | 0.258581  |
| P  | 0.000232  | 2.418757  | -0.243447 |
| H  | 1.068933  | 3.141411  | 0.380015  |

|   |           |           |           |
|---|-----------|-----------|-----------|
| H | 0.000772  | 3.090832  | -1.507351 |
| H | -1.069075 | 3.141387  | 0.379043  |
| P | -2.470968 | -0.214834 | 0.029191  |
| H | -2.960729 | -1.366034 | 0.717946  |
| H | -3.196813 | 0.800192  | 0.725266  |
| H | -3.258494 | -0.291577 | -1.158541 |
| P | 2.471049  | -0.215237 | 0.030129  |
| H | 2.961148  | -1.367858 | 0.716340  |
| H | 3.259185  | -0.288692 | -1.157399 |
| H | 3.196007  | 0.798446  | 0.729043  |

---

|                     |                     |
|---------------------|---------------------|
| Energy E(RPBE-PBE)  | -2091.50611765 a.u. |
|                     | -5491249.31 kJ/mol  |
| SCF Convergence:    | 0.3285D-08          |
| <S**2>:             | 0.0000              |
| Charge:             | 0.0000              |
| Maximum Force:      | 0.000004            |
| ZPE-correction:     | 0.085375 a.u.       |
|                     | 224.15 kJ/mol       |
| Energy (298K):      | -2091.405740 a.u.   |
|                     | -5490985.77 kJ/mol  |
| Enthalpy (298K):    | -2091.404796 a.u.   |
|                     | -5490983.29 kJ/mol  |
| Free Energy (298K): | -2091.464234 a.u.   |
|                     | -5491139.35 kJ/mol  |
| Lowest Frequency    | 61.8091 cm-1        |

### W(PH3) d

Route: #P UPBEPBE/GenECP/Auto GFInput Opt Freq  
Atom Coordinates (x,y,z) in Angstrom

---

|    |           |           |           |
|----|-----------|-----------|-----------|
| W  | 0.000021  | -0.000044 | -0.000014 |
| Cl | -0.228108 | -1.619485 | -1.725345 |
| Cl | 0.228073  | 1.619249  | 1.725504  |
| P  | -2.514989 | 0.001528  | 0.254739  |
| H  | -3.293935 | 0.065001  | -0.936613 |
| H  | -3.126717 | -1.118822 | 0.889649  |
| H  | -3.114611 | 1.059741  | 0.998566  |
| P  | 2.514876  | -0.001155 | -0.254885 |
| H  | 3.293936  | -0.073462 | 0.935891  |
| H  | 3.113834  | -1.054515 | -1.006114 |
| H  | 3.127104  | 1.123303  | -0.881989 |
| Cl | -0.209927 | 1.740900  | -1.605183 |
| Cl | 0.209996  | -1.740875 | 1.605248  |

---

Energy E(UPBE-PBE) -2593.40529231 a.u.  
-6808985.59 kJ/mol  
SCF Convergence: 0.4068D-08  
<S\*\*2>: 2.0101  
Charge: 0.0000  
Maximum Force: 0.000043  
ZPE-correction: 0.057801 a.u.  
151.76 kJ/mol  
Energy (298K): -2593.332852 a.u.  
-6808795.40 kJ/mol  
Enthalpy (298K): -2593.331908 a.u.  
-6808792.92 kJ/mol  
Free Energy (298K): -2593.393206 a.u.  
-6808953.86 kJ/mol  
Lowest Frequency 47.0814 cm-1

### W(PMe3) a

Route: #P PBEPBE/GenECP/Auto GFInput Freq  
Atom Coordinates (x,y,z) in Angstrom

---

|    |           |           |           |
|----|-----------|-----------|-----------|
| W  | -0.002284 | -0.000175 | -0.000401 |
| Cl | 0.002632  | -0.000513 | 2.490920  |
| Cl | -0.007827 | -0.011542 | -2.491291 |
| P  | -1.778916 | -1.739712 | 0.347441  |
| C  | -3.242394 | -1.239476 | 1.391588  |
| C  | -2.598594 | -2.496272 | -1.140857 |
| C  | -1.321252 | -3.248021 | 1.347325  |
| P  | 1.776592  | 1.738927  | 0.344965  |
| C  | 2.587679  | 2.493214  | -1.148616 |
| C  | 1.318388  | 3.246350  | 1.346292  |
| C  | 3.241904  | 1.241623  | 1.387512  |
| P  | 1.748621  | -1.770433 | -0.346081 |
| C  | 1.260785  | -3.242975 | -1.382596 |
| C  | 3.249816  | -1.301902 | -1.350952 |
| C  | 2.510590  | -2.578175 | 1.145286  |
| P  | -1.741888 | 1.774349  | -0.347918 |
| C  | -1.242672 | 3.237724  | -1.391231 |
| C  | -3.251947 | 1.316018  | -1.343196 |
| C  | -2.491243 | 2.591565  | 1.145083  |
| H  | -2.089850 | 3.921383  | -1.548818 |
| H  | -0.416946 | 3.787796  | -0.926056 |
| H  | -0.898358 | 2.846447  | -2.358448 |
| H  | -3.926572 | -2.087037 | 1.544648  |
| H  | -2.851084 | -0.900695 | 2.360625  |
| H  | -3.792476 | -0.411116 | 0.931017  |

|   |           |           |           |
|---|-----------|-----------|-----------|
| H | 3.353251  | 3.231008  | -0.865980 |
| H | 3.042934  | 1.696759  | -1.750615 |
| H | 1.818637  | 2.973815  | -1.766840 |
| H | 3.908354  | -2.169543 | -1.504784 |
| H | 2.889788  | -0.938371 | -2.323207 |
| H | 3.820949  | -0.499981 | -0.869292 |
| H | -3.865312 | 2.201726  | -1.564939 |
| H | -2.897919 | 0.870419  | -2.282944 |
| H | -3.869222 | 0.579780  | -0.815894 |
| H | -3.227581 | 3.358131  | 0.861712  |
| H | -2.972304 | 1.825914  | 1.767036  |
| H | -1.691731 | 3.047591  | 1.742831  |
| H | -3.361994 | -3.232855 | -0.849694 |
| H | -3.058766 | -1.700833 | -1.740839 |
| H | -1.834634 | -2.979494 | -1.763373 |
| H | -2.209607 | -3.850848 | 1.585934  |
| H | -0.600616 | -3.875638 | 0.811100  |
| H | -0.856814 | -2.891714 | 2.277032  |
| H | 3.262184  | -3.328960 | 0.859522  |
| H | 2.974762  | -1.807232 | 1.773132  |
| H | 1.718505  | -3.053391 | 1.738145  |
| H | 2.127426  | -3.888926 | -1.586290 |
| H | 0.483190  | -3.834515 | -0.886313 |
| H | 0.856807  | -2.856286 | -2.328087 |
| H | 2.207652  | 3.846974  | 1.587596  |
| H | 0.597262  | 3.878586  | 0.815532  |
| H | 0.855713  | 2.886410  | 2.275696  |
| H | 3.926966  | 2.089032  | 1.536989  |
| H | 2.850542  | 0.908146  | 2.358529  |
| H | 3.791682  | 0.410418  | 0.931401  |

---

|                     |                                           |
|---------------------|-------------------------------------------|
| Energy E(UPBE-PBE)  | -2830.60174438 a.u.<br>-7431744.88 kJ/mol |
| SCF Convergence:    | 0.9146D-08                                |
| <S**2>:             | 2.0107                                    |
| Charge:             | 0.0000                                    |
| Maximum Force:      | 0.000559                                  |
| ZPE-correction:     | 0.448393 a.u.<br>1177.26 kJ/mol           |
| Energy (298K):      | -2830.116501 a.u.<br>-7430470.87 kJ/mol   |
| Enthalpy (298K):    | -2830.115556 a.u.<br>-7430468.39 kJ/mol   |
| Free Energy (298K): | -2830.220923 a.u.<br>-7430745.03 kJ/mol   |
| Lowest Frequency    | 30.3925 cm-1                              |

### W(PMe3) b

Route: #P PBEPBE/GenECP/Auto GFInput Freq

Atom Coordinates (x,y,z) in Angstrom

---

|    |           |           |           |
|----|-----------|-----------|-----------|
| W  | 0.000014  | 0.042054  | -0.335519 |
| O  | 0.000167  | -0.038558 | -2.071183 |
| Cl | -0.000594 | 0.802791  | 2.105084  |
| Cl | 0.000617  | -2.367651 | 0.253523  |
| P  | -2.509698 | -0.116895 | 0.040735  |
| C  | -3.433260 | 1.465601  | 0.256090  |
| C  | -3.319350 | -0.944400 | -1.397357 |
| C  | -3.015806 | -1.122188 | 1.497516  |
| P  | 2.509784  | -0.116465 | 0.040859  |
| C  | 3.015655  | -1.118504 | 1.499945  |
| C  | 3.319126  | -0.947623 | -1.395295 |
| C  | 3.433910  | 1.466235  | 0.252343  |
| C  | -0.000366 | 2.077389  | -0.425917 |
| O  | -0.000558 | 3.237204  | -0.506305 |
| H  | 4.505295  | 1.281776  | 0.417076  |
| H  | 3.300317  | 2.089369  | -0.641729 |
| H  | 3.015626  | 1.999849  | 1.116323  |
| H  | -4.405714 | -1.025107 | -1.249523 |
| H  | -3.106447 | -0.370932 | -2.308894 |
| H  | -2.881466 | -1.945405 | -1.507224 |
| H  | 4.405312  | -1.029386 | -1.246720 |
| H  | 2.880066  | -1.948282 | -1.503565 |
| H  | 3.107449  | -0.375532 | -2.307984 |
| H  | 4.111244  | -1.186065 | 1.558618  |
| H  | 2.615023  | -0.641773 | 2.403884  |
| H  | 2.570284  | -2.116915 | 1.407344  |
| H  | -4.111454 | -1.187727 | 1.557380  |
| H  | -2.572525 | -2.121211 | 1.401656  |
| H  | -2.613119 | -0.648747 | 2.402278  |
| H  | -4.504489 | 1.281039  | 0.421706  |
| H  | -3.013886 | 1.997607  | 1.120531  |
| H  | -3.300561 | 2.090246  | -0.637059 |

---

Energy E(RPBE-PBE) -2097.47686582 a.u.

-5506925.51 kJ/mol

SCF Convergence: 0.7434D-08

<S\*\*2>: 0.0000

Charge: 0.0000

Maximum Force: 0.000197

ZPE-correction: 0.237332 a.u.

623.12 kJ/mol

Energy (298K): -2097.215558 a.u.

|                     |                          |
|---------------------|--------------------------|
| Enthalpy (298K):    | -5506239.45 kJ/mol       |
|                     | -2097.214614 a.u.        |
| Free Energy (298K): | -5506236.97 kJ/mol       |
|                     | -2097.293315 a.u.        |
| Lowest Frequency    | -5506443.60 kJ/mol       |
|                     | 32.3540 cm <sup>-1</sup> |

### W(PMe3) c

Route: #P PBEPBE/GenECP/Auto GFInput Opt(CalcFC) Freq  
Atom Coordinates (x,y,z) in Angstrom

---

|    |           |           |           |
|----|-----------|-----------|-----------|
| W  | 0.000220  | -0.199865 | -0.219035 |
| O  | 0.000227  | -0.124756 | -1.955557 |
| Cl | 0.000497  | 0.215864  | 2.298437  |
| Cl | 0.000658  | -2.673828 | 0.226135  |
| P  | -0.001250 | 2.292614  | -0.087175 |
| C  | 1.414696  | 3.161236  | 0.748061  |
| C  | -0.003164 | 3.086420  | -1.762894 |
| C  | -1.416643 | 3.159457  | 0.750822  |
| P  | -2.512844 | -0.587554 | -0.089693 |
| C  | -3.049575 | -1.437227 | 1.456667  |
| C  | -3.820406 | 0.722979  | -0.277117 |
| C  | -2.990603 | -1.760687 | -1.438845 |
| P  | 2.513423  | -0.585970 | -0.089765 |
| C  | 3.050638  | -1.436629 | 1.455890  |
| C  | 2.991614  | -1.757883 | -1.439832 |
| C  | 3.820411  | 0.725250  | -0.276169 |
| H  | 4.117879  | -1.695355 | 1.404091  |
| H  | 2.858375  | -0.774843 | 2.310233  |
| H  | 2.439848  | -2.340153 | 1.576434  |
| H  | -4.059309 | -2.012989 | -1.383345 |
| H  | -2.766589 | -1.295484 | -2.408189 |
| H  | -2.380250 | -2.667157 | -1.337302 |
| H  | -0.005463 | 4.182558  | -1.679918 |
| H  | 0.883906  | 2.758480  | -2.319648 |
| H  | -0.888915 | 2.754709  | -2.319486 |
| H  | 4.814371  | 0.260268  | -0.356550 |
| H  | 3.628768  | 1.317590  | -1.181171 |
| H  | 3.809376  | 1.390548  | 0.596192  |
| H  | 4.060652  | -2.008983 | -1.385286 |
| H  | 2.382401  | -2.665122 | -1.338250 |
| H  | 2.766252  | -1.292515 | -2.408781 |
| H  | -1.223275 | 4.239288  | 0.828034  |
| H  | -2.338542 | 2.998488  | 0.180087  |
| H  | -1.533976 | 2.733342  | 1.755652  |

|   |           |           |           |
|---|-----------|-----------|-----------|
| H | 1.221005  | 4.241089  | 0.824209  |
| H | 1.533416  | 2.736332  | 1.753254  |
| H | 2.335973  | 2.999913  | 0.176430  |
| H | -4.813936 | 0.257431  | -0.359504 |
| H | -3.811234 | 1.387474  | 0.595886  |
| H | -3.627737 | 1.316311  | -1.181244 |
| H | -4.117224 | -1.694504 | 1.406100  |
| H | -2.439873 | -2.341555 | 1.576694  |
| H | -2.855402 | -0.775588 | 2.310693  |

---

Energy E(RPBE-PBE) -2445.02996439 a.u.  
-6419426.17 kJ/mol  
SCF Convergence: 0.2822D-08  
<S\*\*2>: 0.0000  
Charge: 0.0000  
Maximum Force: 0.000004  
ZPE-correction: 0.341519 a.u.  
896.66 kJ/mol  
Energy (298K): -2444.659151 a.u.  
-6418452.60 kJ/mol  
Enthalpy (298K): -2444.658207 a.u.  
-6418450.12 kJ/mol  
Free Energy (298K): -2444.746499 a.u.  
-6418681.93 kJ/mol  
Lowest Frequency 38.3913 cm-1

### W(PMe3) d

Route: #P PBEPBE/GenECP/Auto GFInput Opt Freq  
Atom Coordinates (x,y,z) in Angstrom

---

|    |           |           |           |
|----|-----------|-----------|-----------|
| W  | 0.000004  | -0.019808 | -0.000461 |
| Cl | -0.092561 | -1.709376 | -1.682020 |
| Cl | 0.114981  | 1.672449  | 1.685707  |
| P  | -2.560766 | 0.017665  | 0.047281  |
| C  | -3.342999 | -0.135344 | -1.617011 |
| C  | -3.354992 | -1.321231 | 1.038828  |
| C  | -3.284070 | 1.574088  | 0.726369  |
| P  | 2.560760  | 0.017714  | -0.046109 |
| C  | 3.341754  | -0.132977 | 1.618935  |
| C  | 3.355991  | -1.322470 | -1.035143 |
| C  | 3.284206  | 1.573379  | -0.726804 |
| Cl | -0.115102 | 1.671500  | -1.687326 |
| Cl | 0.092729  | -1.708872 | 1.681830  |
| H  | -4.438469 | -0.085699 | -1.540502 |
| H  | -2.973930 | 0.679315  | -2.253598 |



|   |           |           |           |
|---|-----------|-----------|-----------|
| H | -3.039374 | -1.089104 | -2.067306 |
| H | 4.437259  | -0.083292 | 1.542980  |
| H | 2.972190  | 0.682425  | 2.254262  |
| H | 3.037988  | -1.086247 | 2.070166  |
| H | -4.450764 | -1.244136 | 0.996022  |
| H | -3.032482 | -2.293667 | 0.644375  |
| H | -3.014121 | -1.247479 | 2.079499  |
| H | -4.382414 | 1.540329  | 0.697805  |
| H | -2.937150 | 1.712575  | 1.758232  |
| H | -2.920594 | 2.419961  | 0.128019  |
| H | 4.382539  | 1.540106  | -0.697256 |
| H | 2.938106  | 1.710263  | -1.759157 |
| H | 2.919880  | 2.419951  | -0.129958 |
| H | 4.451731  | -1.245456 | -0.991229 |
| H | 3.032965  | -2.294388 | -0.639830 |
| H | 3.016285  | -1.249948 | -2.076283 |

---

Energy E(UPBE-PBE) -2829.09970226 a.u.  
-7427801.27 kJ/mol

SCF Convergence: 0.3619D-08  
<S\*\*2>: 2.0112  
Maximum Force: 0.000042

ZPE-correction: 0.228382 a.u.  
599.62 kJ/mol

Energy (298K): -2828.847032 a.u.  
-7427137.88 kJ/mol

Enthalpy (298K): -2828.846088 a.u.  
-7427135.40 kJ/mol

Free Energy (298K): -2828.927932 a.u.  
-7427350.29 kJ/mol

Lowest Frequency 17.6917 cm-1

### W(PPh2Me) a

Route: #P PBEPBE/GenECP/Auto GFInput Freq  
Atom Coordinates (x,y,z) in Angstrom

---

|    |           |           |           |
|----|-----------|-----------|-----------|
| W  | 0.192597  | 0.002879  | -0.290540 |
| Cl | -0.305435 | -0.682532 | -2.619660 |
| P  | -1.533607 | -1.523554 | 0.867316  |
| P  | -1.486712 | 1.894551  | -0.785442 |
| Cl | 0.703738  | 0.734157  | 2.011567  |
| P  | 1.855910  | -1.955633 | -0.366848 |
| P  | 2.046092  | 1.528406  | -1.161628 |
| C  | -0.803733 | -2.383412 | 2.351200  |
| H  | -0.284404 | -1.620429 | 2.943307  |

|   |           |           |           |
|---|-----------|-----------|-----------|
| H | -0.082175 | -3.141304 | 2.023547  |
| H | -1.586973 | -2.843829 | 2.966934  |
| C | -1.220085 | 2.650280  | -2.469518 |
| H | -0.301642 | 3.249723  | -2.463198 |
| H | -1.114725 | 1.825422  | -3.185211 |
| H | -2.075933 | 3.273161  | -2.759955 |
| C | 2.828411  | -1.992983 | -1.958321 |
| H | 2.119288  | -1.799321 | -2.772943 |
| H | 3.299115  | -2.971773 | -2.115839 |
| H | 3.591157  | -1.204194 | -1.939291 |
| C | 2.222838  | 1.474694  | -3.008943 |
| H | 2.482499  | 0.452673  | -3.305146 |
| H | 1.254941  | 1.710626  | -3.462685 |
| H | 2.987794  | 2.171664  | -3.371892 |
| C | -2.360414 | -2.929219 | -0.038085 |
| C | -3.022716 | -0.789998 | 1.751819  |
| C | -1.575603 | 3.410381  | 0.301533  |
| C | -3.321934 | 1.542487  | -1.005340 |
| C | 1.221084  | -3.726266 | -0.446764 |
| C | 3.205061  | -2.167133 | 0.910138  |
| C | 3.819183  | 1.255470  | -0.601201 |
| C | 1.991203  | 3.375063  | -0.821575 |
| C | -2.802883 | -2.731847 | -1.363089 |
| C | -3.505461 | -3.743520 | -2.052581 |
| C | -3.768702 | -4.977562 | -1.420619 |
| C | -2.628670 | -4.168007 | 0.586396  |
| C | -3.322403 | -5.187945 | -0.098330 |
| H | -2.584579 | -1.780810 | -1.867524 |
| H | -3.844106 | -3.565799 | -3.087768 |
| H | -4.316055 | -5.772875 | -1.955888 |
| H | -2.296667 | -4.359222 | 1.617967  |
| H | -3.515263 | -6.150393 | 0.406021  |
| C | -4.351024 | -1.053927 | 1.357912  |
| C | -5.440466 | -0.537269 | 2.092971  |
| C | -5.214838 | 0.255144  | 3.237695  |
| C | -2.804612 | 0.011929  | 2.896988  |
| C | -3.888613 | 0.532136  | 3.635634  |
| H | -4.552346 | -1.669843 | 0.467841  |
| H | -6.470539 | -0.758635 | 1.764653  |
| H | -6.065392 | 0.654699  | 3.816835  |
| H | -1.775603 | 0.233376  | 3.224905  |
| H | -3.694939 | 1.150736  | 4.529387  |
| C | -1.567501 | 3.257933  | 1.704614  |
| C | -1.686816 | 4.375530  | 2.558400  |
| C | -1.810756 | 5.671349  | 2.013527  |
| C | -1.702593 | 4.711726  | -0.234367 |

|   |           |           |           |
|---|-----------|-----------|-----------|
| C | -1.814813 | 5.835318  | 0.611866  |
| H | -1.451593 | 2.255878  | 2.138787  |
| H | -1.678256 | 4.230205  | 3.652386  |
| H | -1.900916 | 6.549445  | 2.676441  |
| H | -1.710712 | 4.872133  | -1.322973 |
| H | -1.905725 | 6.843142  | 0.171452  |
| C | -4.312016 | 2.122289  | -0.185152 |
| C | -5.683147 | 1.894860  | -0.435684 |
| C | -6.083105 | 1.081475  | -1.516128 |
| C | -3.731052 | 0.725058  | -2.085040 |
| C | -5.099232 | 0.493326  | -2.341035 |
| H | -4.022908 | 2.763194  | 0.662005  |
| H | -6.439823 | 2.359540  | 0.219629  |
| H | -7.154593 | 0.907968  | -1.716999 |
| H | -2.975424 | 0.271464  | -2.747367 |
| H | -5.396975 | -0.142983 | -3.192635 |
| C | 1.497956  | -4.684398 | 0.552486  |
| C | 1.033753  | -6.013609 | 0.429438  |
| C | 0.293714  | -6.403988 | -0.705719 |
| C | 0.467374  | -4.124005 | -1.575548 |
| C | 0.012770  | -5.452159 | -1.709929 |
| H | 2.099451  | -4.407968 | 1.433416  |
| H | 1.264686  | -6.747355 | 1.221285  |
| H | -0.064899 | -7.442857 | -0.807075 |
| H | 0.214473  | -3.387867 | -2.355903 |
| H | -0.574590 | -5.739056 | -2.598672 |
| C | 2.947254  | -1.875253 | 2.267392  |
| C | 3.930074  | -2.089295 | 3.258417  |
| C | 5.196532  | -2.598389 | 2.900230  |
| C | 4.475949  | -2.678750 | 0.563753  |
| C | 5.467069  | -2.888460 | 1.545758  |
| H | 1.978980  | -1.442068 | 2.557263  |
| H | 3.704363  | -1.849313 | 4.311872  |
| H | 5.969786  | -2.765306 | 3.670163  |
| H | 4.714173  | -2.922183 | -0.482839 |
| H | 6.454239  | -3.282829 | 1.249097  |
| C | 4.079007  | 1.114358  | 0.780264  |
| C | 5.397502  | 0.969902  | 1.259331  |
| C | 6.482170  | 0.953037  | 0.356151  |
| C | 4.910837  | 1.236907  | -1.497956 |
| C | 6.233529  | 1.080290  | -1.026324 |
| H | 3.240349  | 1.102205  | 1.494684  |
| H | 5.574205  | 0.857489  | 2.342344  |
| H | 7.514821  | 0.834960  | 0.727141  |
| H | 4.751333  | 1.346289  | -2.582091 |
| H | 7.070737  | 1.063516  | -1.745459 |

|   |          |          |           |
|---|----------|----------|-----------|
| C | 1.847611 | 3.805508 | 0.516940  |
| C | 1.870781 | 5.176726 | 0.842818  |
| C | 2.023146 | 6.145336 | -0.173036 |
| C | 2.137277 | 4.350958 | -1.832005 |
| C | 2.147604 | 5.727968 | -1.514012 |
| H | 1.696220 | 3.062642 | 1.316017  |
| H | 1.756117 | 5.488248 | 1.894822  |
| H | 2.038024 | 7.219677 | 0.079090  |
| H | 2.252117 | 4.057069 | -2.887475 |
| H | 2.261316 | 6.473598 | -2.320055 |

---

Energy E(UPBE-PBE) -4361.11385999 a.u.  
-11450104.44 kJ/mol

SCF Convergence: 0.2947D-08  
<S\*\*2>: 2.0138  
Charge: 0.0000  
Maximum Force: 0.000729

ZPE-correction: 0.873234 a.u.  
2292.68 kJ/mol

Energy (298K): -4360.180497 a.u.  
-11447653.89 kJ/mol

Enthalpy (298K): -4360.179553 a.u.  
-11447651.42 kJ/mol

Free Energy (298K): -4360.337870 a.u.  
-11448067.08 kJ/mol

Lowest Frequency -19.6879 cm<sup>-1</sup>

### W(PPh2Me) b

Route: #P PBEPBE/GenECP/Auto GFInput Opt(Loose) Freq

Atom Coordinates (x,y,z) in Angstrom

---

|    |           |           |           |
|----|-----------|-----------|-----------|
| W  | -0.024571 | -0.435185 | -0.125035 |
| O  | -0.184366 | -1.827234 | -1.158513 |
| Cl | 0.375416  | 1.118068  | 1.819825  |
| Cl | -0.524177 | 1.393277  | -1.696733 |
| P  | 2.430652  | -0.098582 | -0.818591 |
| C  | 3.602855  | -1.286056 | -0.025779 |
| C  | 2.547207  | -0.421245 | -2.634131 |
| C  | 3.281695  | 1.534481  | -0.618257 |
| P  | -2.469803 | -0.259489 | 0.692369  |
| C  | -3.211168 | 1.429394  | 0.599638  |
| C  | -3.723739 | -1.324178 | -0.167958 |
| C  | -2.671004 | -0.742347 | 2.467191  |
| C  | 0.457640  | -1.674167 | 1.422308  |
| O  | 0.727158  | -2.399998 | 2.287899  |

|   |           |           |           |
|---|-----------|-----------|-----------|
| H | -3.689912 | -0.539254 | 2.822386  |
| H | -2.457316 | -1.815801 | 2.549926  |
| H | -1.939488 | -0.190182 | 3.071040  |
| H | 3.582508  | -0.340185 | -2.990840 |
| H | 2.131478  | -1.412596 | -2.856257 |
| H | 1.919450  | 0.334511  | -3.124348 |
| C | 2.545203  | 2.729798  | -0.477817 |
| C | 3.215466  | 3.969612  | -0.388653 |
| C | 4.624470  | 4.021861  | -0.437850 |
| C | 4.694056  | 1.589333  | -0.666469 |
| C | 5.364279  | 2.826978  | -0.578178 |
| H | 1.445165  | 2.700357  | -0.442684 |
| H | 2.628169  | 4.896775  | -0.276618 |
| H | 5.147435  | 4.991158  | -0.364224 |
| H | 5.283007  | 0.662259  | -0.765521 |
| H | 6.466822  | 2.856872  | -0.615034 |
| C | 4.176986  | -2.368225 | -0.725924 |
| C | 5.027938  | -3.280454 | -0.061697 |
| C | 5.312608  | -3.112877 | 1.309340  |
| C | 3.886590  | -1.126474 | 1.350962  |
| C | 4.738633  | -2.031078 | 2.015029  |
| H | 3.967076  | -2.518724 | -1.797256 |
| H | 5.467990  | -4.123778 | -0.620934 |
| H | 5.976107  | -3.824811 | 1.829564  |
| H | 3.436726  | -0.290163 | 1.912782  |
| H | 4.951062  | -1.894325 | 3.088862  |
| C | -3.343585 | -2.287054 | -1.124877 |
| C | -4.317442 | -3.107722 | -1.738192 |
| C | -5.678733 | -2.968259 | -1.398062 |
| C | -5.091582 | -1.185319 | 0.168278  |
| C | -6.064783 | -2.002809 | -0.441107 |
| H | -2.282641 | -2.401545 | -1.400793 |
| H | -4.005617 | -3.855822 | -2.486773 |
| H | -6.440105 | -3.606970 | -1.878311 |
| H | -5.408618 | -0.424474 | 0.901313  |
| H | -7.128120 | -1.882980 | -0.171459 |
| C | -3.779417 | 1.878416  | -0.613666 |
| C | -4.306691 | 3.182000  | -0.714619 |
| C | -4.262854 | 4.053048  | 0.396013  |
| C | -3.157419 | 2.306680  | 1.704064  |
| C | -3.684280 | 3.612749  | 1.605349  |
| H | -3.810670 | 1.211474  | -1.490161 |
| H | -4.746921 | 3.520408  | -1.668027 |
| H | -4.672583 | 5.074789  | 0.316431  |
| H | -2.690149 | 1.987964  | 2.649050  |
| H | -3.636268 | 4.288244  | 2.476504  |

---

|                     |                     |
|---------------------|---------------------|
| Energy E(RPBE-PBE)  | -2862.72945720 a.u. |
|                     | -7516096.19 kJ/mol  |
| SCF Convergence:    | 0.9677D-08          |
| <S**2>:             | 0.0000              |
| Charge:             | 0.0000              |
| Maximum Force:      | 0.000088            |
| ZPE-correction:     | 0.448138 a.u.       |
|                     | 1176.59 kJ/mol      |
| Energy (298K):      | -2862.244448 a.u.   |
|                     | -7514822.80 kJ/mol  |
| Enthalpy (298K):    | -2862.243504 a.u.   |
|                     | -7514820.32 kJ/mol  |
| Free Energy (298K): | -2862.358331 a.u.   |
|                     | -7515121.80 kJ/mol  |
| Lowest Frequency    | 0.9871 cm-1         |

### W(PPh2Me) c

Route: #P PBEPBE/GenECP/Auto GFInput Geom=check Freq  
Atom Coordinates (x,y,z) in Angstrom

---

|    |           |           |           |
|----|-----------|-----------|-----------|
| W  | 0.255020  | -0.669270 | -0.193103 |
| O  | 0.202025  | -1.245271 | -1.845012 |
| Cl | 0.062096  | 0.573160  | 1.966951  |
| Cl | 1.087000  | -2.580849 | 1.140536  |
| P  | -0.563111 | 1.569882  | -1.034559 |
| C  | 0.501474  | 3.106999  | -0.904762 |
| C  | -0.836149 | 1.444945  | -2.865651 |
| C  | -2.174613 | 2.292876  | -0.434043 |
| P  | -2.047196 | -1.791449 | 0.192704  |
| C  | -2.882298 | -1.558714 | 1.820559  |
| C  | -3.388854 | -1.509447 | -1.070327 |
| C  | -1.878431 | -3.629900 | 0.010376  |
| P  | 2.755571  | -0.183470 | -0.514715 |
| C  | 3.173896  | 0.828003  | -2.012912 |
| C  | 3.690065  | 0.583778  | 0.880907  |
| C  | 3.744091  | -1.721079 | -0.895751 |
| H  | 2.808311  | 1.856648  | -1.898006 |
| H  | 4.254912  | 0.820985  | -2.207512 |
| H  | 2.658851  | 0.356354  | -2.860621 |
| H  | -2.851954 | -4.123693 | 0.128441  |
| H  | -1.493340 | -3.821106 | -0.999774 |
| H  | -1.142482 | -4.003138 | 0.732423  |
| H  | -1.336430 | 2.333477  | -3.269421 |
| H  | 0.141079  | 1.310175  | -3.345162 |

|   |           |           |           |
|---|-----------|-----------|-----------|
| H | -1.441509 | 0.555770  | -3.069031 |
| C | 1.406009  | 3.259928  | 0.167667  |
| C | 2.191555  | 4.427946  | 0.291209  |
| C | 2.087925  | 5.456080  | -0.669655 |
| C | 0.394936  | 4.148449  | -1.855688 |
| C | 1.187172  | 5.311399  | -1.747378 |
| H | 1.489868  | 2.462264  | 0.922616  |
| H | 2.888664  | 4.525614  | 1.140741  |
| H | 2.704157  | 6.367294  | -0.580177 |
| H | -0.313652 | 4.071641  | -2.695411 |
| H | 1.095457  | 6.108579  | -2.505140 |
| C | -2.202071 | 3.088506  | 0.734567  |
| C | -3.416307 | 3.629085  | 1.208873  |
| C | -4.622074 | 3.385235  | 0.514697  |
| C | -3.385574 | 2.045730  | -1.118667 |
| C | -4.601988 | 2.590193  | -0.651128 |
| H | -1.270061 | 3.291279  | 1.285157  |
| H | -3.416893 | 4.250264  | 2.121158  |
| H | -5.571425 | 3.813536  | 0.879874  |
| H | -3.400713 | 1.417290  | -2.023006 |
| H | -5.535818 | 2.386806  | -1.202741 |
| C | 3.208673  | -2.670891 | -1.793715 |
| C | 3.954948  | -3.810938 | -2.158622 |
| C | 5.243308  | -4.018064 | -1.618781 |
| C | 5.032332  | -1.930592 | -0.360718 |
| C | 5.778967  | -3.075391 | -0.716373 |
| H | 2.191120  | -2.534783 | -2.196568 |
| H | 3.521587  | -4.547337 | -2.857144 |
| H | 5.824211  | -4.915189 | -1.894841 |
| H | 5.462795  | -1.205250 | 0.348680  |
| H | 6.781769  | -3.230422 | -0.281932 |
| C | 3.512138  | 0.055380  | 2.180752  |
| C | 4.213982  | 0.602571  | 3.274985  |
| C | 5.097448  | 1.687361  | 3.081289  |
| C | 4.576859  | 1.666068  | 0.691224  |
| C | 5.277442  | 2.218731  | 1.786202  |
| H | 2.817700  | -0.785559 | 2.341722  |
| H | 4.061785  | 0.182866  | 4.283691  |
| H | 5.642859  | 2.119140  | 3.938198  |
| H | 4.731796  | 2.096578  | -0.310737 |
| H | 5.966437  | 3.065562  | 1.623787  |
| C | -3.274182 | -0.257784 | 2.209282  |
| C | -3.917633 | -0.040893 | 3.444610  |
| C | -4.159490 | -1.125114 | 4.316646  |
| C | -3.120597 | -2.637877 | 2.698557  |
| C | -3.753662 | -2.423253 | 3.942626  |

|   |           |           |           |
|---|-----------|-----------|-----------|
| H | -3.067669 | 0.601973  | 1.552769  |
| H | -4.217924 | 0.982031  | 3.728840  |
| H | -4.654404 | -0.957184 | 5.288846  |
| H | -2.808011 | -3.659133 | 2.431123  |
| H | -3.926791 | -3.276069 | 4.621098  |
| C | -3.032003 | -1.596998 | -2.436398 |
| C | -4.008247 | -1.455916 | -3.445842 |
| C | -5.357358 | -1.220830 | -3.097035 |
| C | -4.738497 | -1.283168 | -0.728519 |
| C | -5.718577 | -1.135182 | -1.735352 |
| H | -1.978587 | -1.772945 | -2.714988 |
| H | -3.714641 | -1.531515 | -4.507217 |
| H | -6.123512 | -1.109551 | -3.883730 |
| H | -5.036227 | -1.215082 | 0.329955  |
| H | -6.770274 | -0.957113 | -1.451230 |

---

|                     |                                           |
|---------------------|-------------------------------------------|
| Energy E(RPBE-PBE)  | -3592.91357097 a.u.<br>-9433194.58 kJ/mol |
| SCF Convergence:    | 0.7291D-08                                |
| <S**2>:             | 0.0000                                    |
| Charge:             | 0.0000                                    |
| Maximum Force:      | 0.000166                                  |
| ZPE-correction:     | 0.658327 a.u.<br>1728.44 kJ/mol           |
| Energy (298K):      | -3592.206842 a.u.<br>-9431339.06 kJ/mol   |
| Enthalpy (298K):    | -3592.205898 a.u.<br>-9431336.59 kJ/mol   |
| Free Energy (298K): | -3592.341248 a.u.<br>-9431691.95 kJ/mol   |
| Lowest Frequency    | 15.7131 cm <sup>-1</sup>                  |

### W(PPh2Me) d

Route: #P PBEPBE/GenECP/Auto GFInput Opt(Loose) Freq  
Atom Coordinates (x,y,z) in Angstrom

---

|    |           |           |           |
|----|-----------|-----------|-----------|
| W  | 0.000116  | -0.022899 | -0.000238 |
| Cl | -0.323417 | -1.719716 | 1.637746  |
| Cl | 0.427466  | 1.644589  | -1.657665 |
| P  | 2.481073  | -0.025141 | 0.747678  |
| C  | 2.637165  | -0.143060 | 2.586605  |
| C  | 3.455910  | -1.440358 | 0.079402  |
| C  | 3.527067  | 1.465426  | 0.383989  |



|    |           |           |           |
|----|-----------|-----------|-----------|
| P  | -2.481257 | -0.025366 | -0.747610 |
| C  | -2.637495 | -0.143751 | -2.586486 |
| C  | -3.455916 | -1.440457 | -0.078917 |
| C  | -3.527044 | 1.465254  | -0.383967 |
| Cl | -0.427929 | 1.644989  | 1.656878  |
| Cl | 0.322899  | -1.720501 | -1.637462 |
| H  | 3.693969  | -0.180699 | 2.881758  |
| H  | 2.165431  | 0.753904  | 3.007751  |
| H  | 2.091129  | -1.023059 | 2.947983  |
| H  | -3.694274 | -0.181683 | -2.881684 |
| H  | -2.165886 | 0.753203  | -3.007809 |
| H  | -2.091254 | -1.023705 | -2.947683 |
| C  | -3.723809 | -1.483424 | 1.309082  |
| C  | -4.436082 | -2.564097 | 1.866354  |
| C  | -4.875684 | -3.623480 | 1.041124  |
| C  | -3.891043 | -2.503384 | -0.897952 |
| C  | -4.597754 | -3.592507 | -0.341282 |
| H  | -3.371920 | -0.669184 | 1.964648  |
| H  | -4.640185 | -2.584000 | 2.950321  |
| H  | -5.427083 | -4.474197 | 1.477130  |
| H  | -3.678916 | -2.501451 | -1.978811 |
| H  | -4.929185 | -4.418931 | -0.992869 |
| C  | -2.951763 | 2.751448  | -0.487277 |
| C  | -3.742418 | 3.905233  | -0.300363 |
| C  | -5.116908 | 3.782884  | -0.003268 |
| C  | -4.904156 | 1.347522  | -0.092569 |
| C  | -5.695980 | 2.500031  | 0.100096  |
| H  | -1.878015 | 2.860670  | -0.709610 |
| H  | -3.277850 | 4.902796  | -0.380566 |
| H  | -5.734792 | 4.684601  | 0.149541  |
| H  | -5.371444 | 0.352934  | -0.009816 |
| H  | -6.769787 | 2.392583  | 0.331188  |
| C  | 2.952402  | 2.751759  | 0.489278  |
| C  | 3.743153  | 3.905412  | 0.302054  |
| C  | 5.117157  | 3.782852  | 0.002746  |
| C  | 4.903674  | 1.347497  | 0.090395  |
| C  | 5.695610  | 2.499899  | -0.102531 |
| H  | 1.879125  | 2.861248  | 0.713705  |
| H  | 3.279063  | 4.903069  | 0.383869  |
| H  | 5.735110  | 4.684488  | -0.150262 |
| H  | 5.370564  | 0.352847  | 0.006164  |
| H  | 6.769022  | 2.392248  | -0.335360 |
| C  | 3.721748  | -1.484892 | -1.308955 |
| C  | 4.434246  | -2.565579 | -1.865910 |
| C  | 4.876114  | -3.623478 | -1.039985 |
| C  | 3.893224  | -2.501869 | 0.899109  |

|   |          |           |           |
|---|----------|-----------|-----------|
| C | 4.600169 | -3.591019 | 0.342781  |
| H | 3.368071 | -0.671863 | -1.965062 |
| H | 4.636731 | -2.586681 | -2.950158 |
| H | 5.427699 | -4.474212 | -1.475722 |
| H | 3.682656 | -2.498826 | 1.980267  |
| H | 4.933330 | -4.416306 | 0.994925  |

---

|                     |                                           |
|---------------------|-------------------------------------------|
| Energy E(UPBE-PBE)  | -3594.35246081 a.u.<br>-9436972.39 kJ/mol |
| SCF Convergence:    | 0.9529D-08                                |
| <S**2>:             | 2.0118                                    |
| Charge:             | 0.0000                                    |
| Maximum Force:      | 0.000036                                  |
| ZPE-correction:     | 0.439700 a.u.<br>1154.43 kJ/mol           |
| Energy (298K):      | -3593.875942 a.u.<br>-9435721.29 kJ/mol   |
| Enthalpy (298K):    | -3593.874998 a.u.<br>-9435718.81 kJ/mol   |
| Free Energy (298K): | -3593.987343 a.u.<br>-9436013.77 kJ/mol   |
| Lowest Frequency    | 12.2779 cm-1                              |

### PH3

Route: #P PBEPBE/TZVP/Auto GFinpnt Opt Freq  
Atom Coordinates (x,y,z) in Angstrom

---

|   |           |           |           |
|---|-----------|-----------|-----------|
| P | 0.000049  | -0.000001 | -0.132179 |
| H | -0.607866 | -1.034228 | 0.660731  |
| H | 1.199259  | -0.009082 | 0.661218  |
| H | -0.592130 | 1.043318  | 0.660730  |

---

|                     |                                         |
|---------------------|-----------------------------------------|
| Energy E(RPBE-PBE)  | -342.97587704 a.u.<br>-900483.17 kJ/mol |
| SCF Convergence:    | 0.6625D-09                              |
| <S**2>:             | 0.0000                                  |
| Charge:             | 0.0000                                  |
| Maximum Force:      | 0.000013                                |
| ZPE-correction:     | 0.023149 a.u.<br>60.78 kJ/mol           |
| Energy (298K):      | -342.949806 a.u.<br>-900414.72 kJ/mol   |
| Enthalpy (298K):    | -342.948861 a.u.<br>-900412.23 kJ/mol   |
| Free Energy (298K): | -342.973803 a.u.                        |

Lowest Frequency                      -900477.72 kJ/mol  
                                                    983.5440 cm<sup>-1</sup>

### PMe3

Route: #P PBEPBE/TZVP/Auto GFinp Opt Freq  
Atom Coordinates (x,y,z) in Angstrom

---

|   |           |           |           |
|---|-----------|-----------|-----------|
| P | -0.001022 | -0.000647 | -0.609554 |
| C | 1.038427  | -1.274614 | 0.283091  |
| C | 0.587185  | 1.535197  | 0.282638  |
| C | -1.624295 | -0.259872 | 0.283925  |
| H | -2.332350 | 0.526823  | -0.013314 |
| H | -2.055872 | -1.225224 | -0.016951 |
| H | -1.512786 | -0.244328 | 1.379720  |
| H | -0.033199 | 2.391802  | -0.016997 |
| H | 0.545082  | 1.429482  | 1.378207  |
| H | 1.622664  | 1.755251  | -0.013952 |
| H | 0.723279  | -2.282375 | -0.022679 |
| H | 2.091848  | -1.153907 | -0.007164 |
| H | 0.958769  | -1.192080 | 1.378523  |

---

Energy E(RPBE-PBE)                      -460.80226212 a.u.  
                                                    -1209836.34 kJ/mol

SCF Convergence:                      0.6338D-09  
<S\*\*2>:                                      0.0000

Charge:                                      0.0000

Maximum Force:                         0.000336

ZPE-correction:                         0.109338 a.u.  
                                                    287.07 kJ/mol

Energy (298K):                           -460.686006 a.u.  
                                                    -1209531.11 kJ/mol

Enthalpy (298K):                        -460.685061 a.u.  
                                                    -1209528.63 kJ/mol

Free Energy (298K):                    -460.722489 a.u.  
                                                    -1209626.89 kJ/mol

### PPh2Me

Route: #P PBEPBE/Gen/Auto GFinp Opt Freq  
Atom Coordinates (x,y,z) in Angstrom

---

|   |           |          |           |
|---|-----------|----------|-----------|
| P | 0.035198  | 1.388965 | -0.700841 |
| C | -1.432453 | 0.324182 | -0.294058 |
| C | 1.439830  | 0.270190 | -0.191918 |
| C | 0.059808  | 2.585186 | 0.736530  |

|   |           |           |           |
|---|-----------|-----------|-----------|
| H | 1.000786  | 3.148988  | 0.680052  |
| H | -0.767999 | 3.301124  | 0.637965  |
| H | 0.004132  | 2.084960  | 1.713954  |
| C | 1.373443  | -0.618556 | 0.905387  |
| C | 2.485379  | -1.411886 | 1.258297  |
| C | 3.683497  | -1.322364 | 0.513843  |
| C | 2.639211  | 0.345731  | -0.934804 |
| C | 3.759787  | -0.440305 | -0.584906 |
| H | 0.440354  | -0.700893 | 1.488887  |
| H | 2.417868  | -2.103382 | 2.116075  |
| H | 4.553691  | -1.943696 | 0.788144  |
| H | 2.696526  | 1.024728  | -1.803864 |
| H | 4.689247  | -0.368635 | -1.175813 |
| C | -2.425263 | 0.678223  | 0.647226  |
| C | -3.570376 | -0.129572 | 0.833428  |
| C | -3.735924 | -1.309754 | 0.079692  |
| C | -1.618153 | -0.856727 | -1.054778 |
| C | -2.750637 | -1.673359 | -0.866601 |
| H | -2.317940 | 1.592080  | 1.254697  |
| H | -4.333236 | 0.165844  | 1.574672  |
| H | -4.628119 | -1.942810 | 0.225344  |
| H | -0.862766 | -1.145345 | -1.806833 |
| H | -2.869405 | -2.593375 | -1.464696 |

---

Energy E(RPBE-PBE) -843.43656282 a.u.  
-2214442.70 kJ/mol

SCF Convergence: 0.8490D-08  
<S\*\*2>: 0.0000  
Charge: 0.0000  
Maximum Force: 0.000047

ZPE-correction: 0.215489 a.u.  
565.77 kJ/mol

Energy (298K): -843.208116 a.u.  
-2213842.91 kJ/mol

Enthalpy (298K): -843.207172 a.u.  
-2213840.43 kJ/mol

Free Energy (298K): -843.262143 a.u.  
-2213984.76 kJ/mol

Lowest Frequency 24.0487 cm-1

## CO

Route: #P PBEPBE/TZVP/Auto GFinp Opt Freq  
Atom Coordinates (x,y,z) in Angstrom

---

|   |          |          |           |
|---|----------|----------|-----------|
| C | 0.000000 | 0.000000 | -0.650424 |
| O | 0.000000 | 0.000000 | 0.487818  |

---

|                     |                    |
|---------------------|--------------------|
| Energy E(RPBE-PBE)  | -113.22899485 a.u. |
|                     | -297282.73 kJ/mol  |
| SCF Convergence:    | 0.5482D-10         |
| <S**2>:             | 0.0000             |
| Charge:             | 0.0000             |
| Maximum Force:      | 0.000057           |
| ZPE-correction:     | 0.004861 a.u.      |
|                     | 12.76 kJ/mol       |
| Energy (298K):      | -113.221773 a.u.   |
|                     | -297263.77 kJ/mol  |
| Enthalpy (298K):    | -113.220829 a.u.   |
|                     | -297261.29 kJ/mol  |
| Free Energy (298K): | -113.243273 a.u.   |
|                     | -297320.21 kJ/mol  |
| Lowest Frequency    | 2133.8305 cm-1     |

## CO2

Route: #P PBEPBE/TZVP/Auto GFinpnt Opt Freq  
Atom Coordinates (x,y,z) in Angstrom

---

|   |          |          |           |
|---|----------|----------|-----------|
| C | 0.000000 | 0.000000 | 0.000000  |
| O | 0.000000 | 0.000000 | 1.171989  |
| O | 0.000000 | 0.000000 | -1.171989 |

---

|                     |                         |
|---------------------|-------------------------|
| Energy E(RPBE-PBE)  | -188.46897017 a.u.      |
|                     | -494825.28 kJ/mol       |
| SCF Convergence:    | 0.3835D-08              |
| <S**2>:             | 0.0000                  |
| Charge:             | 0.0000                  |
|                     | Maximum Force: 0.000331 |
| ZPE-correction:     | 0.011355 a.u.           |
|                     | 29.81 kJ/mol            |
| Energy (298K):      | -188.454970 a.u.        |
|                     | -494788.52 kJ/mol       |
| Enthalpy (298K):    | -188.454025 a.u.        |
|                     | -494786.04 kJ/mol       |
| Free Energy (298K): | -188.478338 a.u.        |
|                     | -494849.88 kJ/mol       |
| Lowest Frequency    | 643.2571 cm-1           |

## H2O

Route: #P PBEPBE/TZVP/Auto GFinpnt Opt Freq  
Atom Coordinates (x,y,z) in Angstrom

---

|   |          |           |           |
|---|----------|-----------|-----------|
| H | 0.000000 | 0.765486  | -0.477700 |
| O | 0.000000 | 0.000000  | 0.119425  |
| H | 0.000000 | -0.765486 | -0.477700 |

---

|                     |                                        |
|---------------------|----------------------------------------|
| Energy E(RPBE-PBE)  | -76.37435885 a.u.<br>-200520.88 kJ/mol |
| SCF Convergence:    | 0.1529D-09                             |
| <S**2>:             | 0.0000                                 |
| Charge:             | 0.0000                                 |
| Maximum Force:      | 0.000014                               |
| ZPE-correction:     | 0.020666 a.u.<br>54.26 kJ/mol          |
| Energy (298K):      | -76.350857 a.u.<br>-200459.18 kJ/mol   |
| Enthalpy (298K):    | -76.349913 a.u.<br>-200456.70 kJ/mol   |
| Free Energy (298K): | -76.371365 a.u.<br>-200513.02 kJ/mol   |
| Lowest Frequency    | 1570.3557 cm-1                         |

## HCl

Route: #P PBEPBE/TZVP/Auto GFinpnt Opt Freq  
Atom Coordinates (x,y,z) in Angstrom

---

|    |          |          |           |
|----|----------|----------|-----------|
| Cl | 0.000000 | 0.000000 | 0.071989  |
| H  | 0.000000 | 0.000000 | -1.223821 |

---

|                     |                                          |
|---------------------|------------------------------------------|
| Energy E(RPBE-PBE)  | -460.62102476 a.u.<br>-1209360.50 kJ/mol |
| SCF Convergence:    | 0.1943D-09                               |
| <S**2>:             | 0.0000                                   |
| Charge:             | 0.0000                                   |
| Maximum Force:      | 0.000002                                 |
| ZPE-correction:     | 0.006538 a.u.<br>17.17 kJ/mol            |
| Energy (298K):      | -460.612127 a.u.<br>-1209337.14 kJ/mol   |
| Enthalpy (298K):    | -460.611182 a.u.<br>-1209334.66 kJ/mol   |
| Free Energy (298K): | -460.632389 a.u.<br>-1209390.34 kJ/mol   |
| Lowest Frequency    | 2869.6809 cm-1                           |

**Table S6** Relative energies, enthalpies and free energies (in kJ/mol) of tungsten complexes with reference to compound **a**.

|          |                   | <b>W(PH3)</b> | <b>W(PMe3)</b> | <b>W(PMePh2)</b> |
|----------|-------------------|---------------|----------------|------------------|
|          | <b>ΔE</b>         |               |                |                  |
| <b>a</b> |                   | 0             | 0              | 0                |
| <b>b</b> |                   | 2             | -28            | -52              |
| <b>c</b> |                   | 58            | 25             | 10               |
| <b>d</b> |                   | 39            | 14             | -11              |
|          | <b>ΔH (0 K)</b>   |               |                |                  |
| <b>a</b> |                   | 0             | 0              | 0                |
| <b>b</b> |                   | -15           | -38            | -66              |
| <b>c</b> |                   | 43            | 14             | -6               |
| <b>d</b> |                   | 32            | 13             | -15              |
|          | <b>ΔG (298 K)</b> |               |                |                  |
| <b>a</b> |                   | 0             | 0              | 0                |
| <b>b</b> |                   | -59           | -102           | -174             |
| <b>c</b> |                   | 4             | -34            | -80              |
| <b>d</b> |                   | -21           | -62            | -119             |

### Supporting Online material - References

1. *SMART, Version 5.625*; Bruker-AXS: Madison, WI, 2000.
2. *APEX2, Version 2.1–4*; Bruker-AXS: Madison, WI, 2007.
3. *SAINT+, Versions 6.35A and 7.34A*; Bruker-AXS: Madison, WI, 2002, 2006.
4. Sheldrick, G. M. *SADABS, Version 2.05 and Version 2007/2*; University of Göttingen: Göttingen, Germany, 2002, 2007.
5. Sheldrick, G. M. *TWINABS, Version 2007/5*; University of Göttingen: Göttingen, Germany, 2007.
6. *SHELXTL, Version 6.10*; Bruker-AXS: Madison, WI, 2000.
7. Sheldrick, G. M. *SHELXS97 and SHELXL97*; University of Göttingen: Göttingen, Germany, 1997.
8. J. P. Perdew, K. Burke, M. Ernzerhof, *Phys. Rev. Lett.* **77**, 3865 (1996).

9. D. Andrae, U. Häußermann, M. Dolg, H. Stoll, H. Preuß *Theor. Chim. Acta* **77**, 123 (1990).
10. A. Schäfer, C. Huber, R. Ahlrichs, *J. Chem. Phys.* **100**, 5829 (1994).
11. A. Schäfer, H. Horn, R. Ahlrichs, *J. Chem. Phys.* **97**, 2571 (1992).
12. Gaussian 03, Revision D.02. Gaussian, Inc., Wallingford CT, 2004. List of authors:  
[http://gaussian.com/citation\\_g03.htm](http://gaussian.com/citation_g03.htm) (last accessed: April 17, 2009)
